# Supplementary material for: Pt(II) N-confused porphyrin: An expanded pyrrole that affords a stable π-anion
Source: Royal Society of Chemistry journal article supplement (doi:10.1039/b906018a), 2009-01-01

## Supplementary Information

for

### Pt(II) N-confused porphyrin: An expanded pyrrole that affords stable $\pi$ -anion

Dong-Hoon Won, Motoki Toganoh, Hidemitsu Uno, and Hiroyuki Furuta\*

#### Table of Contents

|                                                                                               |    |
|-----------------------------------------------------------------------------------------------|----|
| <b>Figure S1.</b> $^1\text{H}$ NMR spectrum of <b>1-Pt</b> in $\text{CDCl}_3$ -----           | S2 |
| <b>Figure S2.</b> $^1\text{H}$ NMR spectrum of <b>2-Pt</b> in $\text{CDCl}_3$ -----           | S2 |
| <b>Figure S3.</b> $^1\text{H}$ NMR spectrum of <b>3</b> in $\text{CDCl}_3$ -----              | S3 |
| <b>Figure S4.</b> $^1\text{H}$ NMR spectrum of <b>3-Pt</b> in $\text{CDCl}_3$ -----           | S3 |
| <b>Figure S5.</b> pH titration curves for <b>1-Pt</b> and <b>1-Cu</b> -----                   | S4 |
| <b>Figure S6.</b> Packing diagram of $\text{Bu}_4\text{N}^+\cdot(\text{1-Pt}^-)$ -----        | S5 |
| <b>Figure S7.</b> Calculated charge density for <b>1-Pt</b> and <b>1-Pt<sup>-</sup></b> ----- | S6 |

Figure S1.  $^1\text{H}$  NMR spectrum of **1-Pt** in  $\text{CDCl}_3$ .

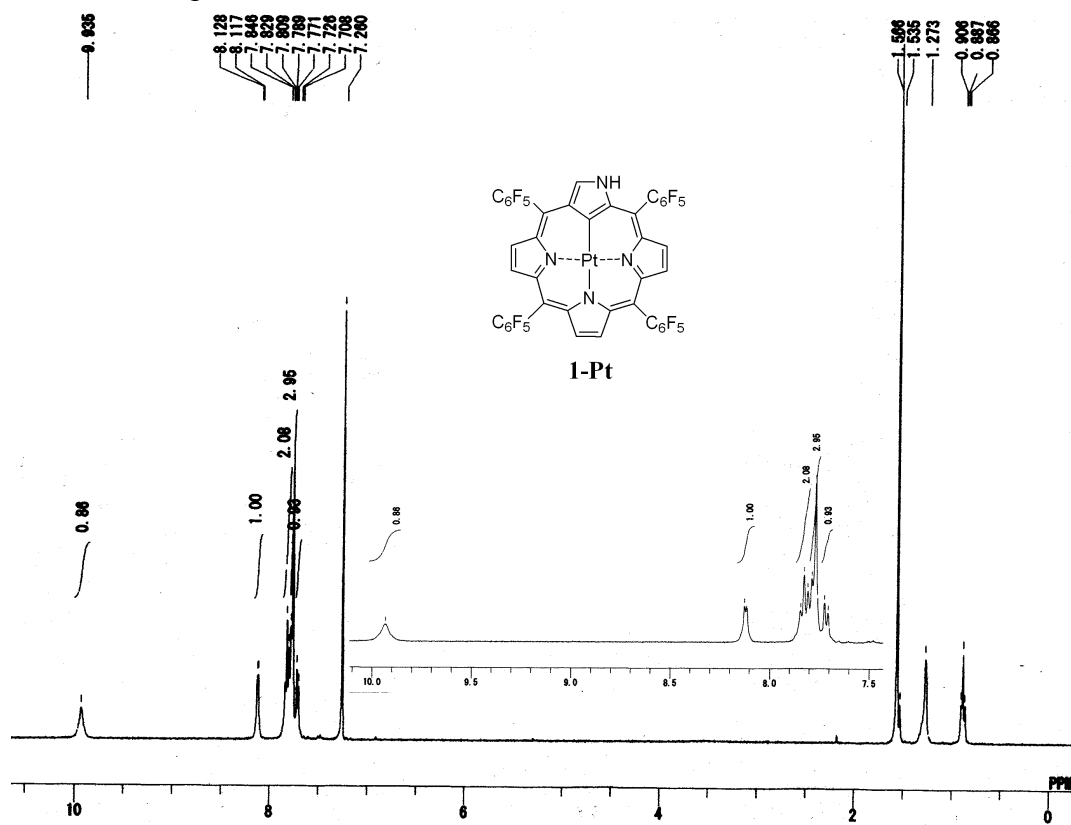

Figure S2.  $^1\text{H}$  NMR spectrum of **2-Pt** in  $\text{CDCl}_3$ .

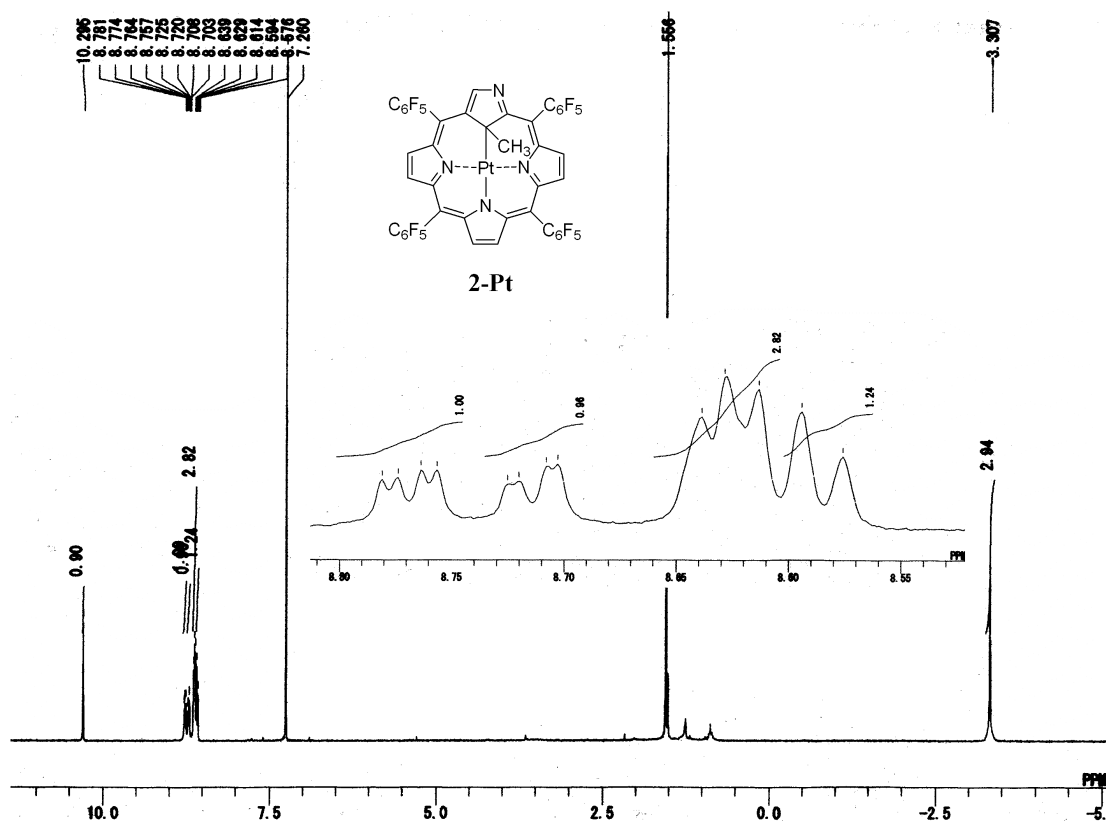

Figure S3.  $^1\text{H}$  NMR spectrum of **3** in  $\text{CDCl}_3$ .

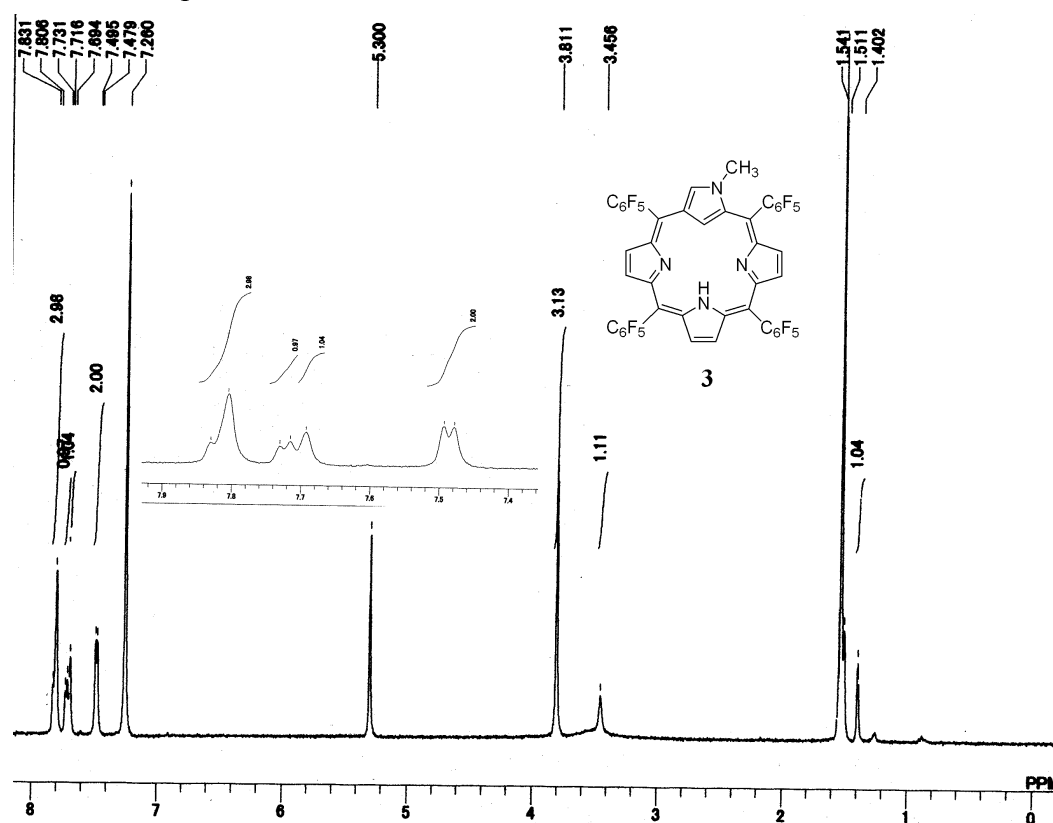

Figure S4.  $^1\text{H}$  NMR spectrum of **3-Pt** in  $\text{CDCl}_3$ .

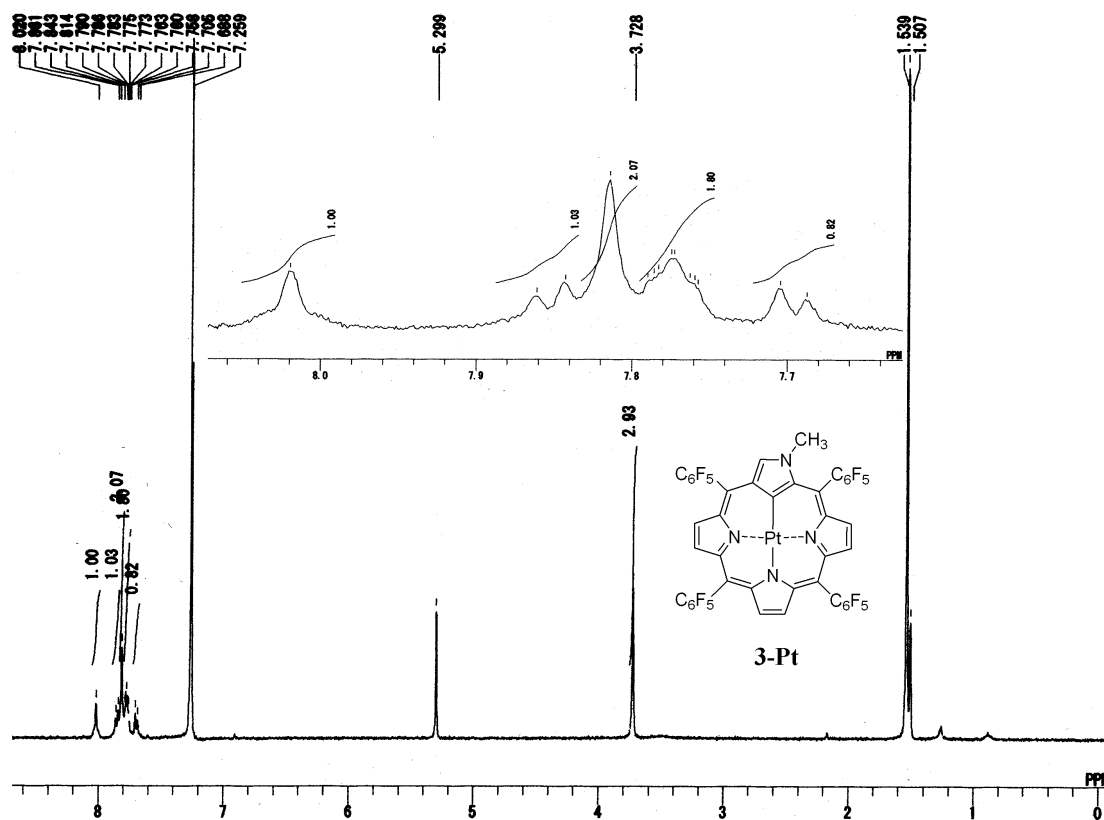

**Figure S5.** pH titration curves for **1-Pt** and **1-Cu**. Titration was performed in 3.5% sodium dodecyl sulfate by adjusting the pH with HCl-NaOH; [**1-Pt**] =  $\sim 2 \times 10^{-5}$  M, [**1-Cu**] =  $\sim 1 \times 10^{-5}$  M.

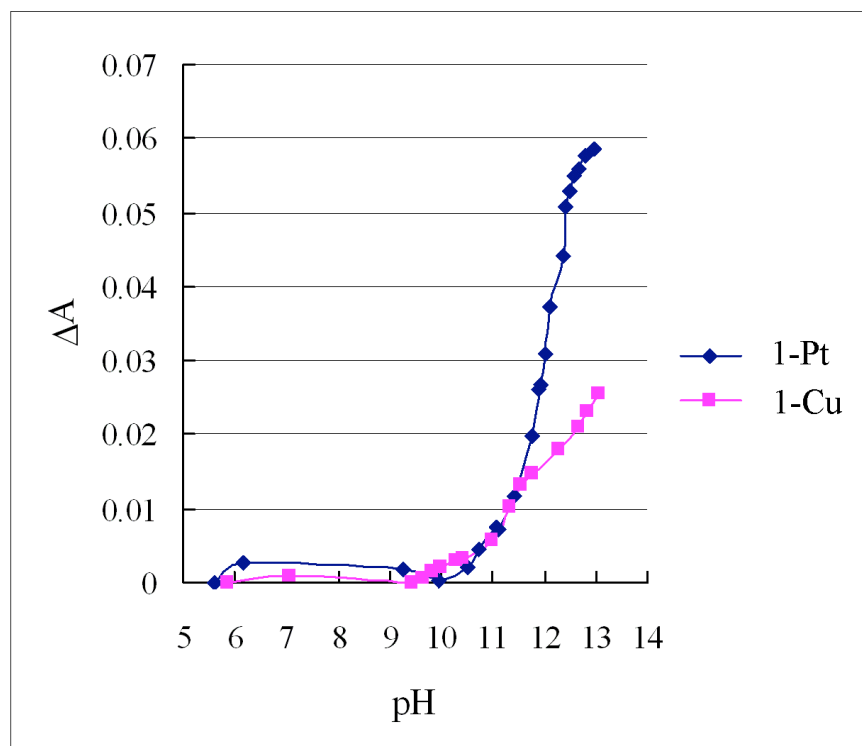

**Figure S6.** Packing diagram of  $\text{Bu}_4\text{N}^+\cdot(1\text{-Pt}^-)$ .

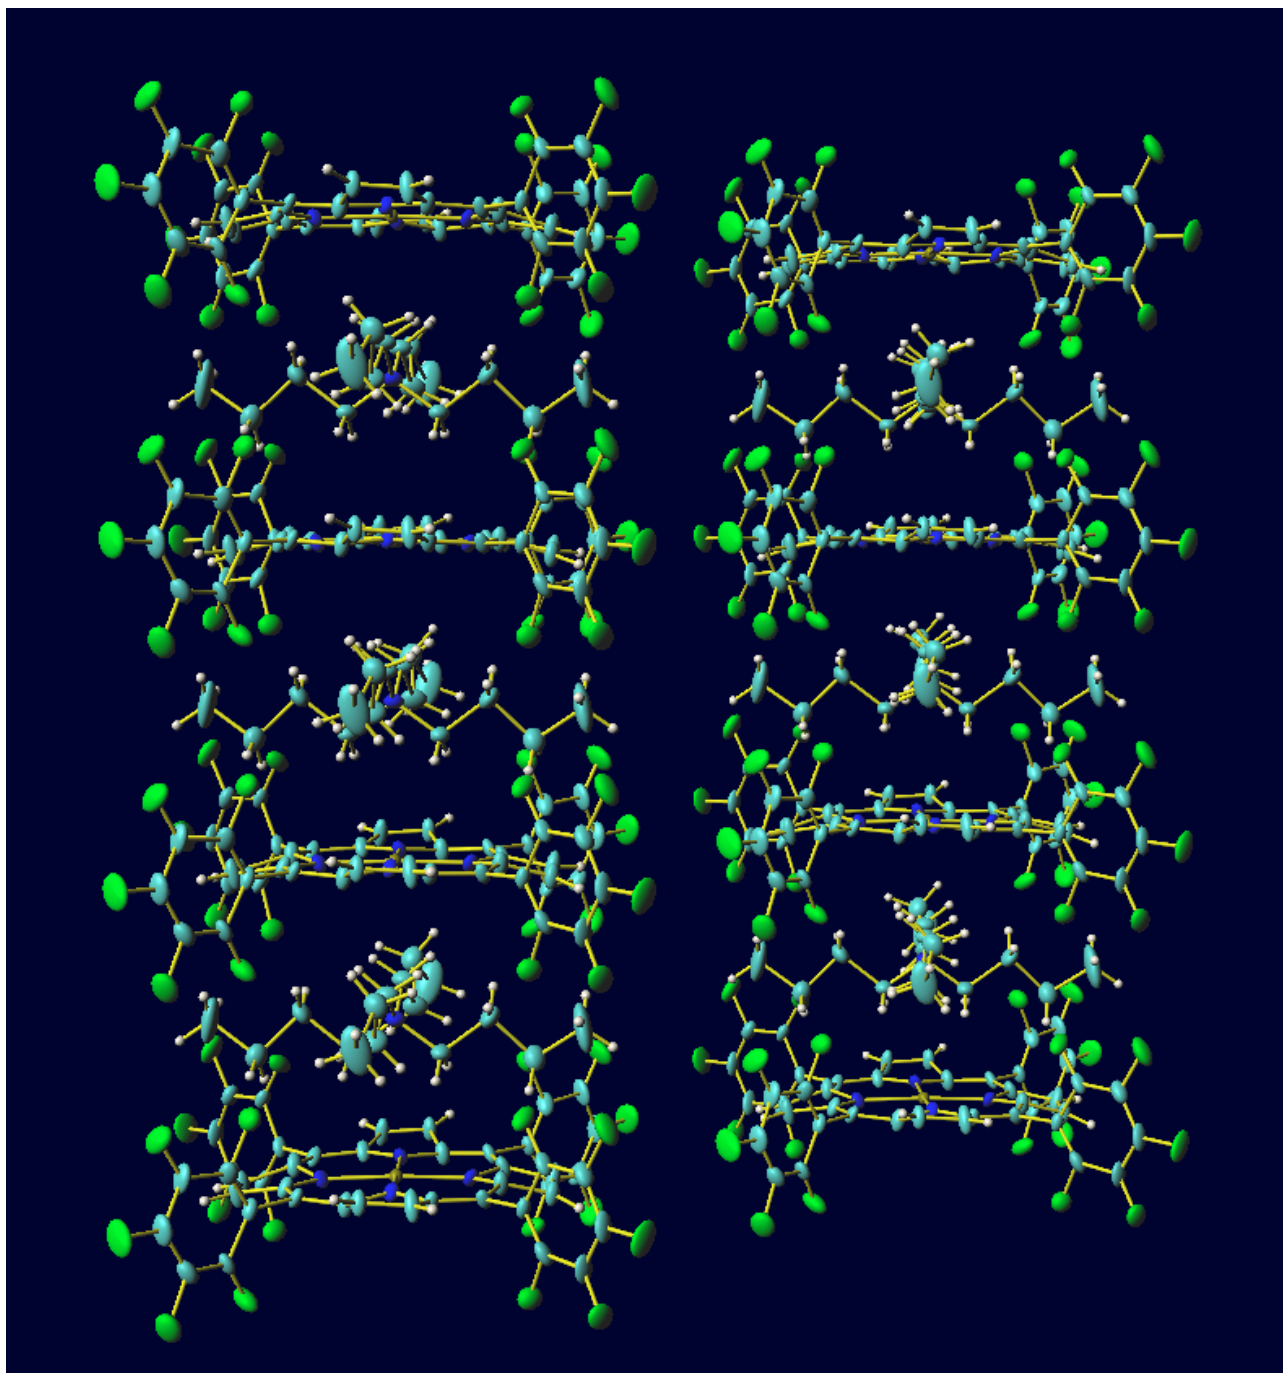

Figure S7. Calculated charge density for a) 1-Pt, b) 1-Pt<sup>-</sup>, and c) their difference.

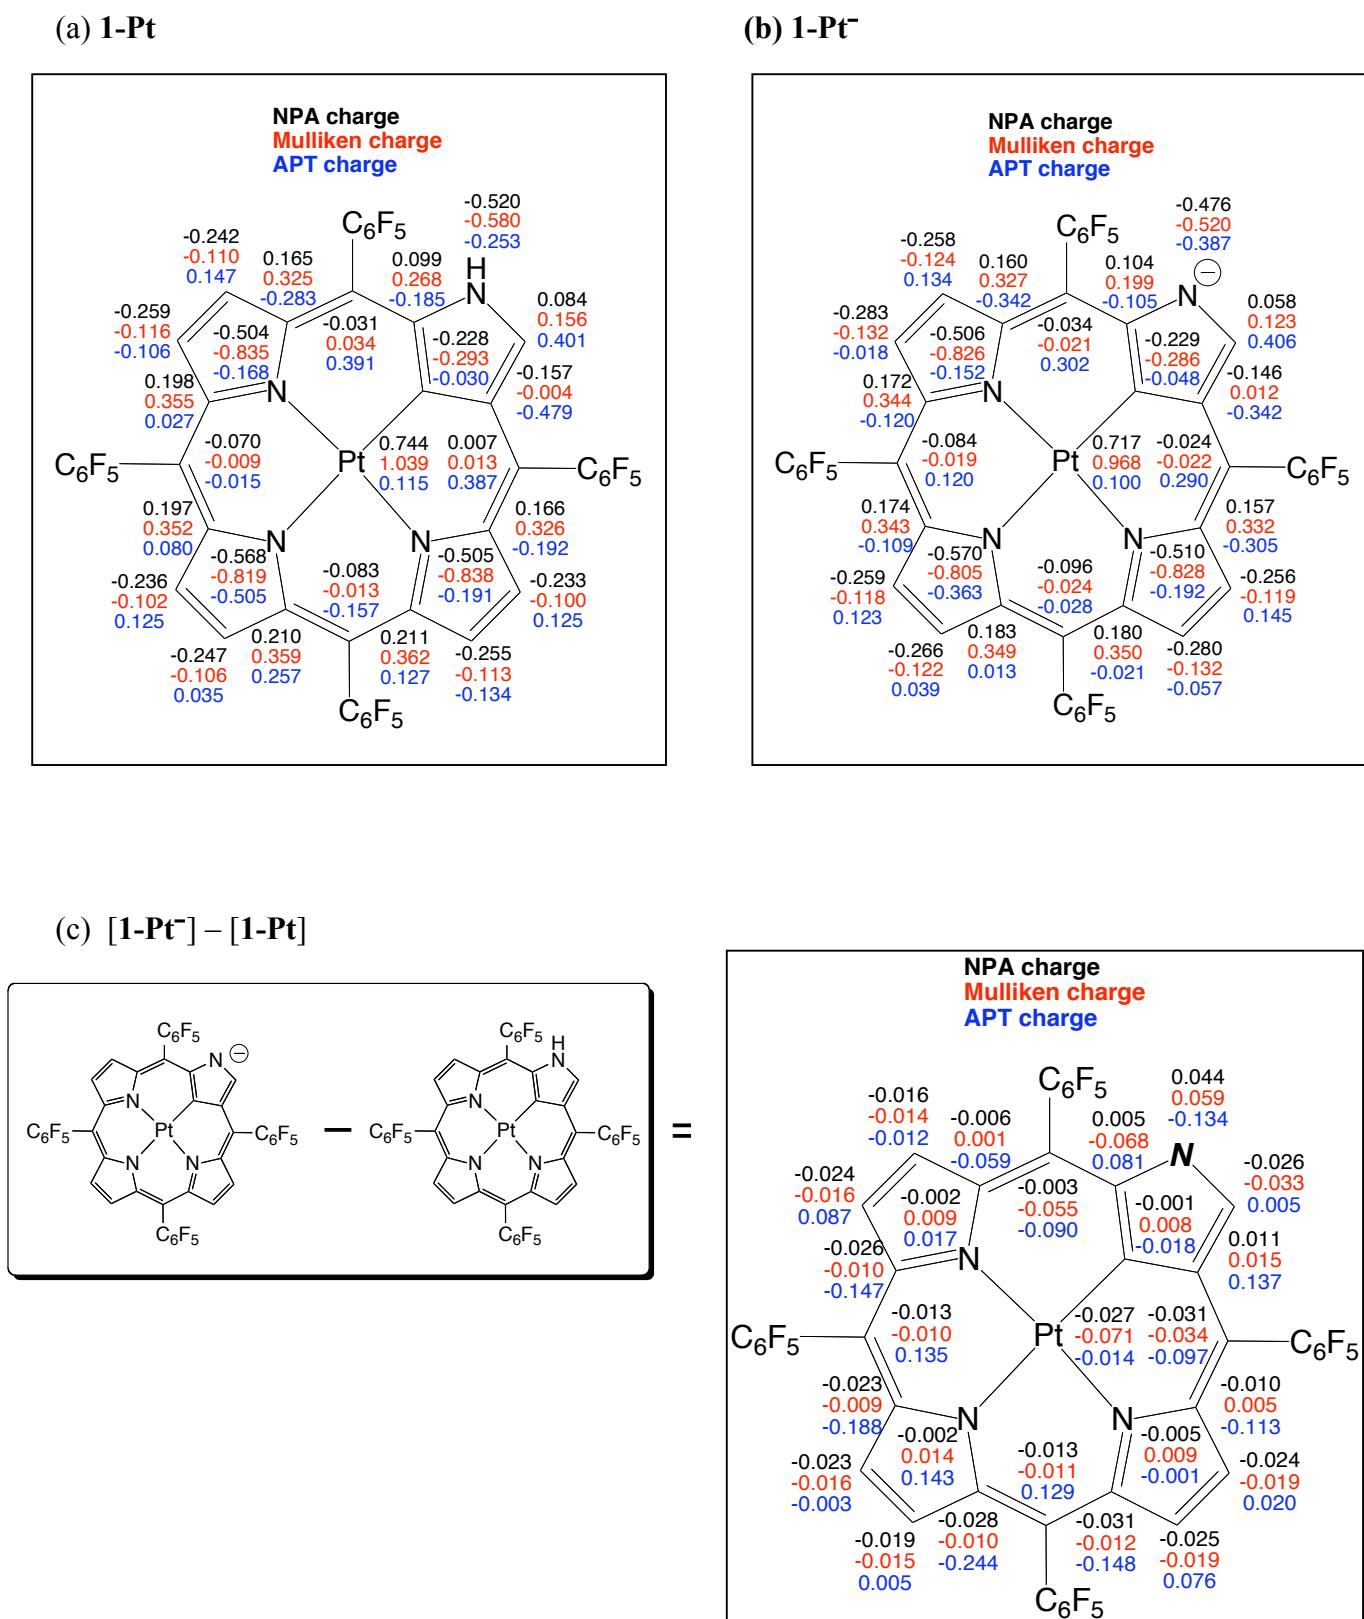

Supplement: b906018a.pdf [file b906018a.pdf]
